# Supplementary material for: Norovirus GII.P16/GII.2–Associated Gastroenteritis, China, 2016
Source: PubMed Central journal article supplement (PMC5512504; doi:10.3201/eid2307.170034), 2017-07
Supplement: 17-0034-Techapp-s1.pdf [file 17-0034-Techapp-s1.pdf]

# Norovirus GII.P16/GII.2–Associated Gastroenteritis Outbreaks, China, 2016

## Technical Appendix

**Technical Appendix Table 1.** Settings of 109 norovirus outbreaks, China, 2016

| Setting      | All genotypes, no. (%) | GII.2, no. (%) |
|--------------|------------------------|----------------|
| Kindergarten | 52 (48)                | 38 (78)        |
| School       | 44 (39)                | 7 (14)         |
| University   | 3 (3)                  | 1 (2)          |
| Community    | 3 (3)                  | 1 (2)          |
| Hospital     | 2 (2)                  | 2 (4)          |
| Workplace    | 5 (5)                  | 0              |

**Technical Appendix Table 2.** Primers used to amplify the complete genome, open reading frames 2–3, and RNA-dependent RNA polymerase of GII.P16/GII.2 noroviruses

| Primer name    | Sequence (5'→3')                 | Position  |
|----------------|----------------------------------|-----------|
| NVORF1–1F*     | ATGAAGATGGCGTCTAACGAC            | 1–21      |
| NVORF1–1R1*    | CTGTGAGAGTGGATGCCAC              | 1562–1544 |
| NVORF1–1R2*    | CTGCTATTCGAGCCAGCAGG             | 1418–1399 |
| NVORF1–2F*     | CAATGAGCTAGCTATGGTGA             | 1220–1201 |
| NVORF1–2R1*    | GAACTCGTCATCTTCTGACT             | 2599–2580 |
| NVORF1–2R2*    | GACAAACGCAGCGCCGGCA              | 2485–2467 |
| NVORF1–3F*     | TGGTTCCACGTATGTCCTTGA            | 2290–2310 |
| NVORF1–3R1*    | ACCGAGGTAGGCAGGCTCA              | 3712–3694 |
| NVORF1–3R2*    | GTGTGGCACAGATGACGGTG             | 3542–3523 |
| NVORF1–4F*     | CGCATGGTTGGCGGACAGATG            | 3362–3382 |
| NVORF1–4R1*    | GCAGTGCCATGAGCTGTATG             | 4901–4882 |
| NVORF1–4R2*    | AGTCCAGTACATCTGCCTC              | 4825–4807 |
| COG2F (sense)† | CARGARBCNATGTTYAGRTGGATGAG       | 5003–5028 |
| G2SKF (sense)† | CNTGGGAGG GCGATCGCA A            | 5046–5064 |
| VNT20†         | GAGTGA CCGCGGCCGCT <sub>20</sub> |           |
| RdRp1500F1*    | GTGCACACTGCAGCAGCC               | 3494–3511 |
| RdRp1500F2*    | CACCGTCATCTGTGCCACAC             | 3523–3542 |
| RdRp1500R*     | CGTCATTCGACCCATCTTCAT            | 5106–5085 |

\*Primers designed in this study.

†Primers from Katayama K, Shirato-Horikoshi H, Kojima S, Kageyama T, Oka T, Hoshino F, et al. Phylogenetic analysis of the complete genome of 18 Norwalk-like viruses. *Virology*. 2002;299:225–39.
